# Supplementary material for: Exploring the potential role of ENPP2 in polycystic ovary syndrome and endometrial cancer through bioinformatic analysis
Source: PeerJ journal article supplement (doi:10.7717/peerj.18666), 2024-12-20
Supplement: raw_data.zip [file raw_data.zip]

## Sheet: Sheet1
area	DHT-ISK								GCs								Endometrium								DHT-HEC-1-A
	group	actin(1)	actin(2)	actin(3)	ENPP2(1)	ENPP2(2)	ENPP2(3)		group	actin(1)	actin(2)	actin(3)	ENPP2(1)	ENPP2(2)	ENPP2(3)		group	actin(1)	actin(2)	actin(3)	ENPP2(1)	ENPP2(2)	ENPP2(3)		group	actin(1)	actin(2)	actin(3)	ENPP2(1)	ENPP2(2)	ENPP2(3)
	control	56721.3	60011.1	54707.6	39045.1	39005.8	33970.9		control	45163.4	40885.2	41673.3	44942.6	41325.2	40391.1		control	44171.6	41676.7	43593.9	28290.5	23711.7	24239.4		control	28777.2	29514.4	27605.7	26660.7	25589.8	21740
	si-AR	53170.9	57803.6	61883.8	19726.8	23678.5	29759.9		HA-PCOS	47589.9	50704.3	45254.2	30932.8	24082.9	26505.7		HA-PCOS	46450.2	42047.6	45081.7	49244.3	46441.1	47378.2		si-AR	30535.4	30986.2	29008.2	19089.7	18691.9	15637.3
	DHT	55987.6	57142	53374.1	63107.9	61610.2	61434.9		NA-PCOS	44732.5	38966.1	41442	20616	24315.5	18007.9		NA-PCOS	44989.8	44654.3	43079.9	31733.8	24905.7	27327.9		DHT	31610.2	32003.2	29694.9	39324.5	38814.7	36496.8
	DHT+si-AR	57858.3	62766.8	55294.2	49684.9	51343.1	51035.4																		DHT+si-AR	32463.4	32167.2	30067.2	32441.9	31149.4	26760.8
normalized to beta-actin values
	control	si-AR	DHT	DHT+si-AR					control	HA-PCOS	NA-PCOS						control	HA-PCOS	NA-PCOS						control	si-AR	DHT	DHT+si-AR
	0.688367	0.371007	1.12718	0.858734					0.995112	0.649986	0.460873						0.640467	1.06015	0.705356						0.926451	0.625165	1.24404	0.99934
	0.649977	0.409636	1.0782	0.817997					1.01076	0.474968	0.624015						0.568943	1.10449	0.557746						0.867028	0.603235	1.21284	0.96836
	0.620954	0.480899	1.15103	0.922979					0.96923	0.585706	0.434533						0.556028	1.05094	0.634353						0.78752	0.539065	1.22906	0.890032
mean	0.653099	0.420514	1.1188	0.86657					0.991702	0.57022	0.506474						0.588479	1.07186	0.632485						0.860333	0.589155	1.22865	0.952578
SD	0.0338147	0.0557475	0.0371312	0.0529277					0.0209756	0.088531	0.102642						0.0454835	0.0286293	0.0738227						0.0697072	0.0447439	0.0156068	0.056337
